# Supplementary material
Source: MDPI journal article supplement (https://www.mdpi.com/2220-9964/13/3/79)
Supplement: s1 [file s1]

## Table of contents

|                                                                                                                                                                                    |    |
|------------------------------------------------------------------------------------------------------------------------------------------------------------------------------------|----|
| <b>Figure S1.</b> PM2.5 concentration sequences. ....                                                                                                                              | 2  |
| <b>Figure S2.</b> PM2.5 concentrations for different seasons. ....                                                                                                                 | 2  |
| <b>Figure S3.</b> EMD decomposition of the PM2.5 sequence of Beijing 1005A Station. ....                                                                                           | 3  |
| <b>Figure S4.</b> EMD decomposition of the PM2.5 sequence of Wuhan 1328A Station. ....                                                                                             | 4  |
| <b>Figure S5.</b> EMD decomposition of the PM2.5 sequence of Kunming 1454A Station. ....                                                                                           | 5  |
|                                                                                                                                                                                    |    |
| <b>Table S1</b> Statistical analysis of PM2.5 dataset. ....                                                                                                                        | 6  |
| <b>Table S2</b> Results of the one sample t-test. ....                                                                                                                             | 6  |
| <b>Table S3</b> Classification of IMFs. ....                                                                                                                                       | 7  |
| <b>Table S4</b> Features selected by mRMR at Beijing 1005A station. ....                                                                                                           | 7  |
| <b>Table S5</b> Features selected by mRMR at Wuhan 1328A station. ....                                                                                                             | 8  |
| <b>Table S6</b> Features selected by mRMR at Kunming 1454A station. ....                                                                                                           | 8  |
| <b>Table S7</b> Prediction performance evaluation metrics in forecasting PM2.5 concentration for next multiple hours. ....                                                         | 8  |
| <b>Table S8</b> prediction performance evaluation metrics of the comparative models at the Beijing 1005A Station in forecasting PM2.5 concentration for next multiple hours. ....  | 9  |
| <b>Table S9</b> prediction performance evaluation metrics of the comparative models at the Wuhan 1328A Station in forecasting PM2.5 concentration for next multiple hours. ....    | 9  |
| <b>Table S10</b> prediction performance evaluation metrics of the comparative models at the Kunming 1454A Station in forecasting PM2.5 concentration for next multiple hours. .... | 10 |

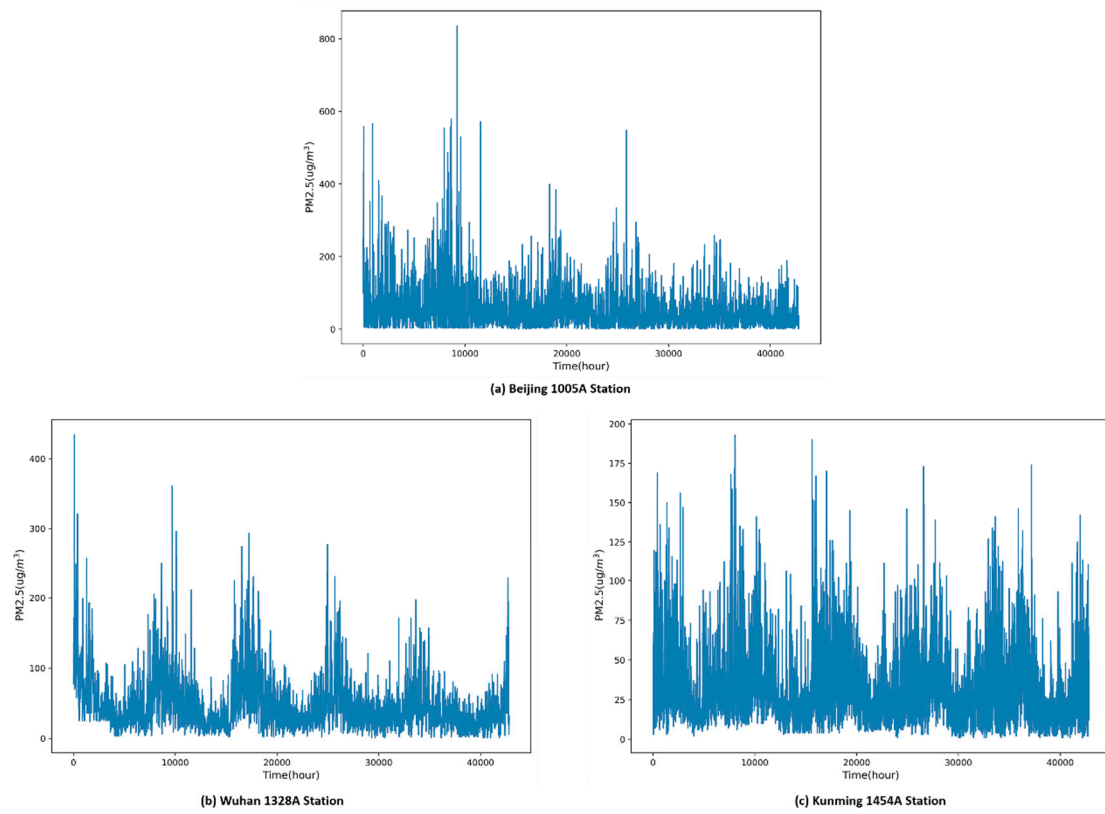

**Figure S1.** PM2.5 concentration sequences.

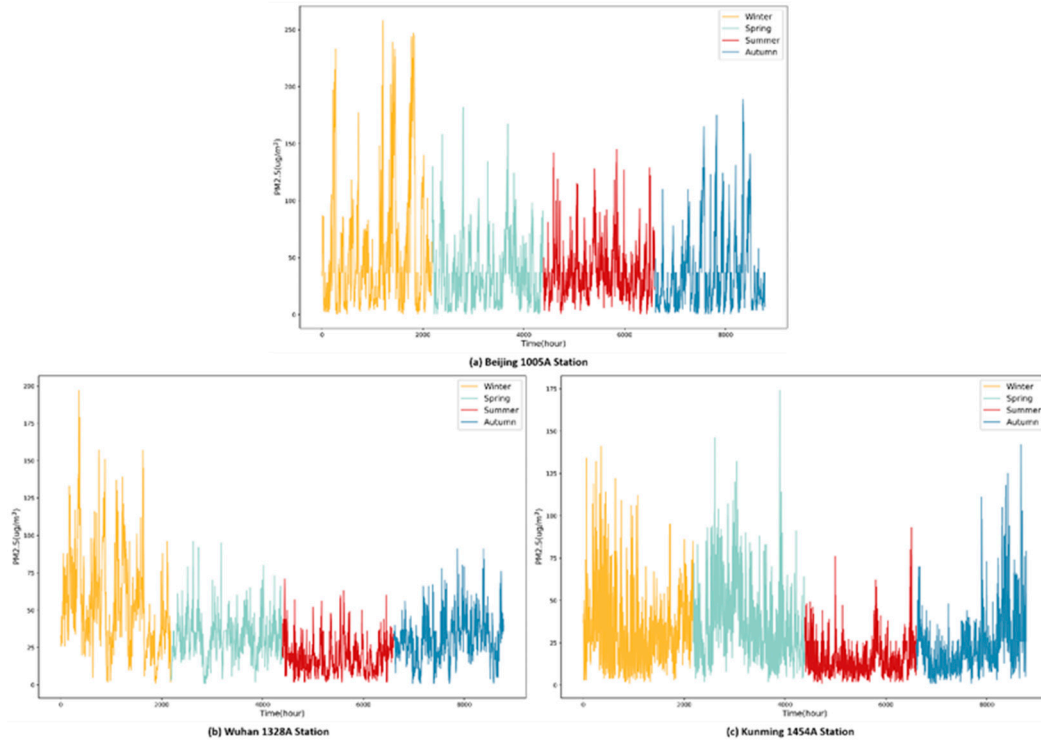

**Figure S2.** PM2.5 concentrations for different seasons.

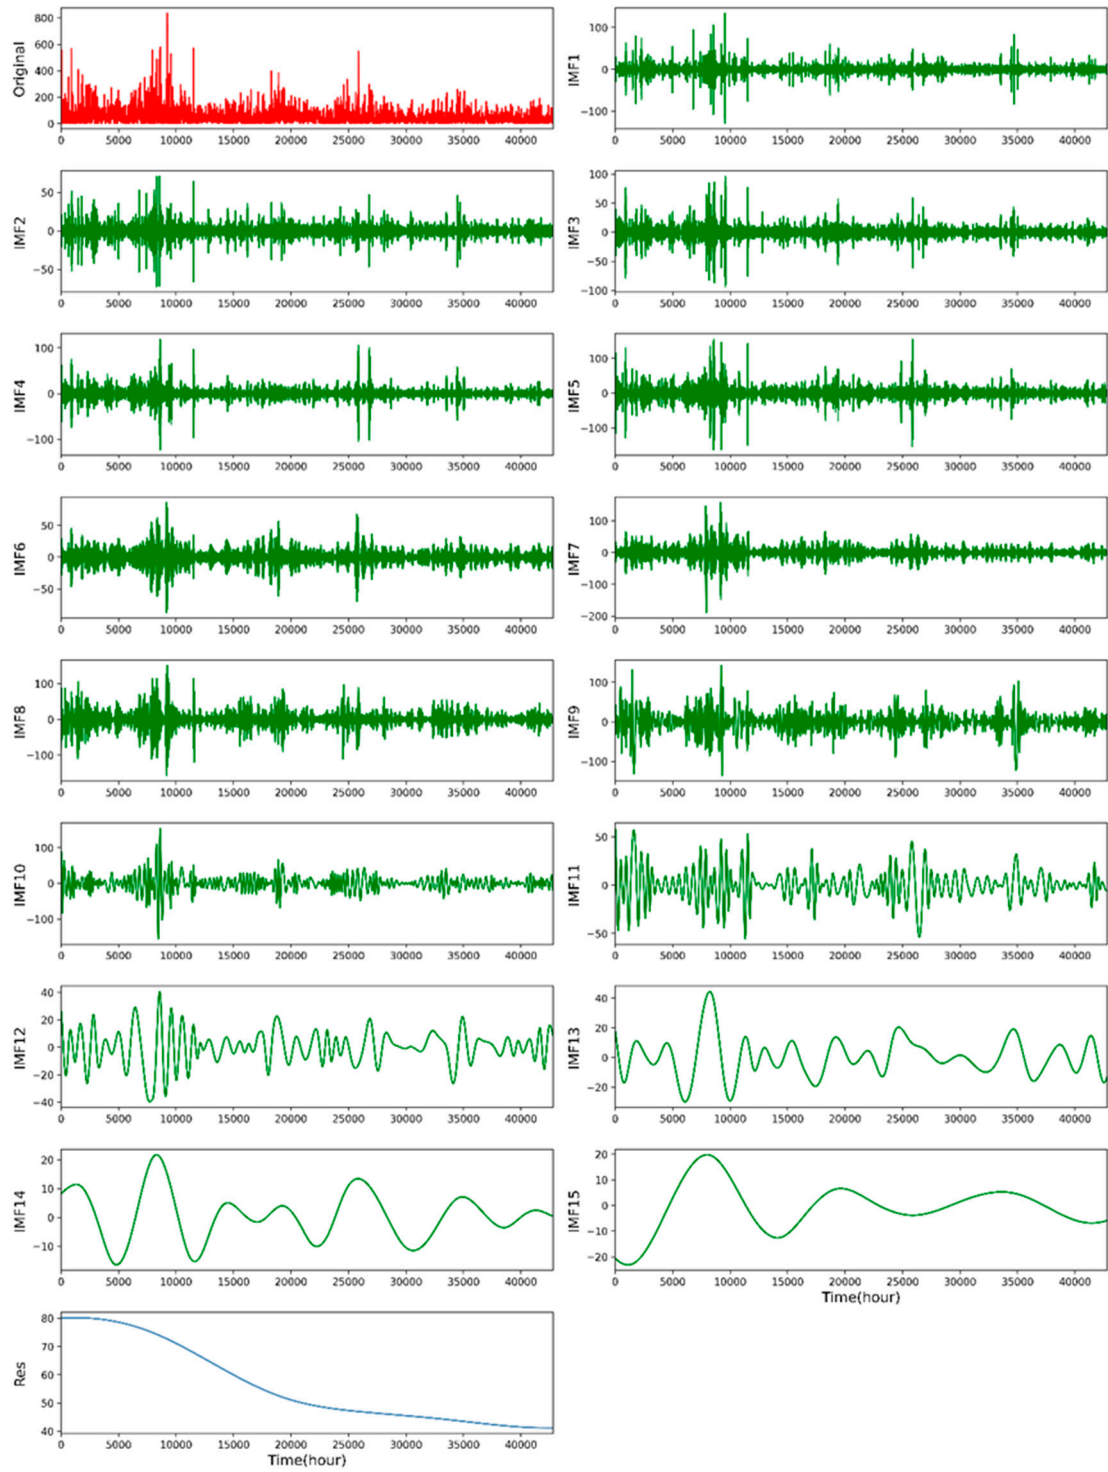

**Figure S3.** EMD decomposition of the PM2.5 sequence of Beijing 1005A Station.

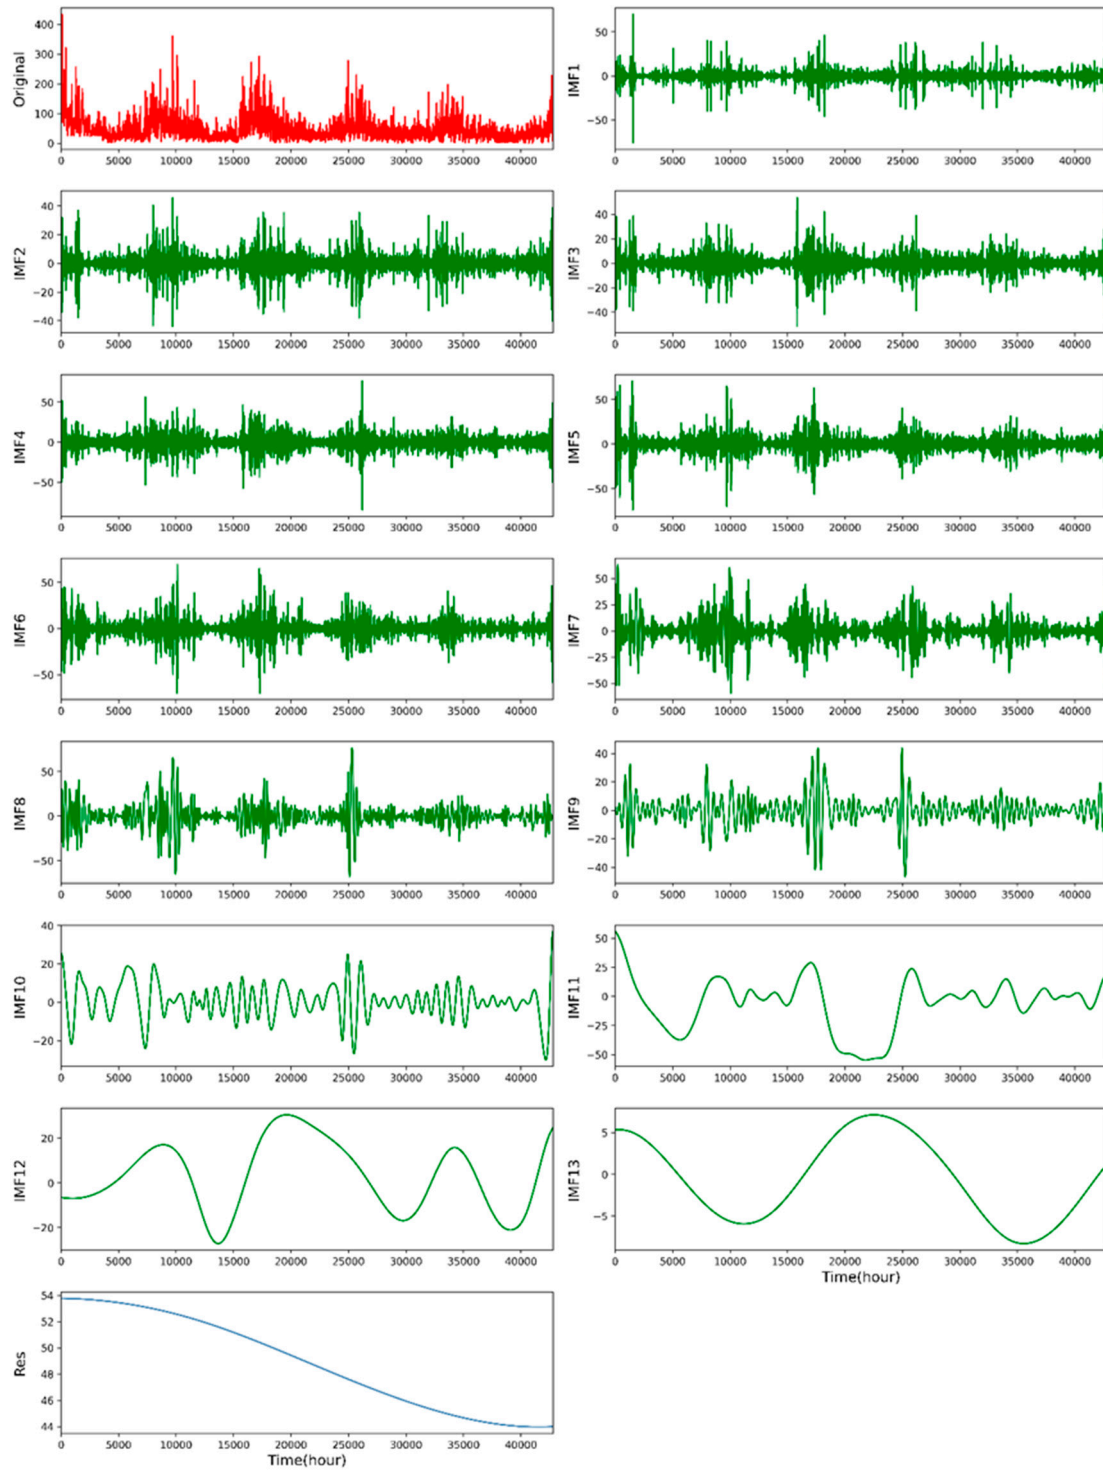

**Figure S4.** EMD decomposition of the PM<sub>2.5</sub> sequence of Wuhan 1328A Station.

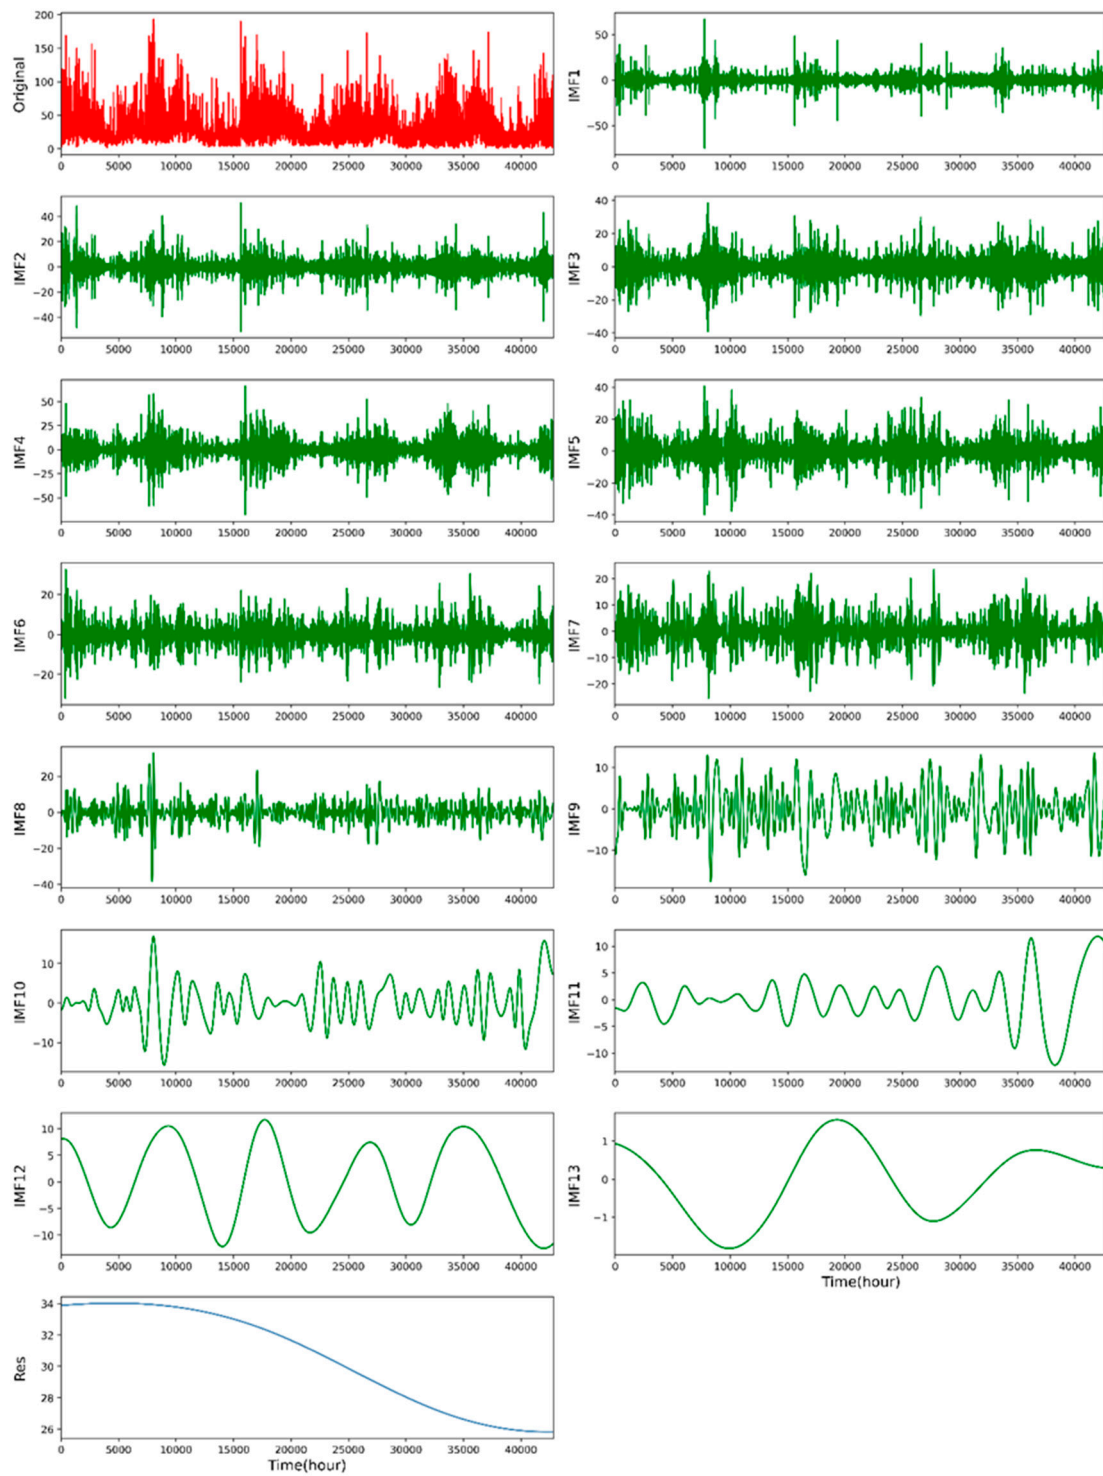

**Figure S5.** EMD decomposition of the PM2.5 sequence of Kunming 1454A Station.

**Table S1** Statistical analysis of PM2.5 dataset.

| Dataset | Station | Min  | Max    | Mean  | Std   |
|---------|---------|------|--------|-------|-------|
| Beijing | 1005A   | 1.00 | 835.00 | 54.31 | 58.53 |
| Wuhan   | 1328A   | 1.00 | 434.00 | 45.39 | 35.24 |
| Kunming | 1454A   | 1.00 | 193.00 | 30.41 | 20.40 |

**Table S2** Results of the one sample t-test.

| IMF               | P-value ( $\alpha = 0.05$ ) |             |               |
|-------------------|-----------------------------|-------------|---------------|
|                   | Beijing 1005A               | Wuhan 1328A | Kunming 1454A |
| IMF <sub>1</sub>  | 0.8850                      | 0.7021      | 0.5828        |
| IMF <sub>2</sub>  | 0.9595                      | 0.8085      | 0.0158        |
| IMF <sub>3</sub>  | 0.3973                      | 0.4073      | 0.0351        |
| IMF <sub>4</sub>  | 0.3313                      | 0.0100      | 0.0499        |
| IMF <sub>5</sub>  | 0.0014                      | 0.0584      | 0.0004        |
| IMF <sub>6</sub>  | 0.0311                      | 0.0096      | 0.7690        |
| IMF <sub>7</sub>  | 0.0006                      | 0.5495      | 0.0042        |
| IMF <sub>8</sub>  | 1.8506e-13                  | 0.0140      | 0.6716        |
| IMF <sub>9</sub>  | 3.0023e-13                  | 0.2958      | 4.0936e-5     |
| IMF <sub>10</sub> | 0.0159                      | 8.3912e-34  | 3.1106e-9     |
| IMF <sub>11</sub> | 0.0191                      | 0           | 1.3414e-16    |
| IMF <sub>12</sub> | 0.3657                      | 0           | 0.0055        |
| IMF <sub>13</sub> | 6.2534e-6                   | 5.1540e-170 | 4.6722e-17    |
| IMF <sub>14</sub> | 8.0691e-38                  |             |               |
| IMF <sub>15</sub> | 1.1175e-60                  |             |               |

**Table S3** Classification of IMFs.

| Station       | High-frequency components |                  |                  |                  | Low-frequency components |                   |                   |                   |
|---------------|---------------------------|------------------|------------------|------------------|--------------------------|-------------------|-------------------|-------------------|
| Beijing 1005A | IMF <sub>1</sub>          | IMF <sub>2</sub> | IMF <sub>3</sub> | IMF <sub>4</sub> | IMF <sub>5</sub>         | IMF <sub>6</sub>  | IMF <sub>7</sub>  | IMF <sub>8</sub>  |
|               | IMF <sub>12</sub>         |                  |                  |                  | IMF <sub>9</sub>         | IMF <sub>10</sub> | IMF <sub>11</sub> | IMF <sub>13</sub> |
|               |                           |                  |                  |                  | IMF <sub>14</sub>        | IMF <sub>15</sub> |                   |                   |
| Wuhan 1328A   | IMF <sub>1</sub>          | IMF <sub>2</sub> | IMF <sub>3</sub> | IMF <sub>5</sub> | IMF <sub>4</sub>         | IMF <sub>6</sub>  | IMF <sub>8</sub>  | IMF <sub>10</sub> |
|               | IMF <sub>7</sub>          | IMF <sub>9</sub> |                  |                  | IMF <sub>11</sub>        | IMF <sub>12</sub> | IMF <sub>13</sub> |                   |
| Kunming 1454A | IMF <sub>1</sub>          | IMF <sub>6</sub> | IMF <sub>8</sub> |                  | IMF <sub>2</sub>         | IMF <sub>3</sub>  | IMF <sub>4</sub>  | IMF <sub>5</sub>  |
|               |                           |                  |                  |                  | IMF <sub>7</sub>         | IMF <sub>9</sub>  | IMF <sub>10</sub> | IMF <sub>11</sub> |
|               |                           |                  |                  |                  | IMF <sub>12</sub>        | IMF <sub>13</sub> |                   |                   |

**Table S4** Features selected by mRMR at Beijing 1005A station.

| Selected features        |                      |                      |                      |                         |                      |                      |                      |                     |
|--------------------------|----------------------|----------------------|----------------------|-------------------------|----------------------|----------------------|----------------------|---------------------|
| High-frequency component |                      |                      |                      | Low-frequency component |                      |                      |                      |                     |
| PM2.5 <sub>t-1</sub>     |                      |                      |                      | PM2.5 <sub>t-1</sub>    | PM2.5 <sub>t-2</sub> | PM2.5 <sub>t-3</sub> | PM2.5 <sub>t-5</sub> |                     |
|                          |                      |                      |                      | PM2.5 <sub>t-4</sub>    |                      |                      |                      |                     |
| PM10 <sub>t-20</sub>     |                      |                      |                      | PM10 <sub>t-2</sub>     | PM10 <sub>t-1</sub>  |                      |                      |                     |
| SO2 <sub>t-7</sub>       |                      |                      |                      | SO2 <sub>t-1</sub>      |                      |                      |                      |                     |
| NO2 <sub>t-3</sub>       |                      |                      |                      | NO2 <sub>t-1</sub>      |                      |                      |                      |                     |
| O3 <sub>t-17</sub>       |                      |                      |                      | O3 <sub>t-18</sub>      | O3 <sub>t-6</sub>    |                      |                      |                     |
| CO <sub>t-10</sub>       |                      |                      |                      | CO <sub>t-1</sub>       |                      |                      |                      |                     |
| High <sub>t-1</sub>      | High <sub>t-8</sub>  | High <sub>t-14</sub> | High <sub>t-2</sub>  | Low <sub>t-1</sub>      | Low <sub>t-2</sub>   | Low <sub>t-7</sub>   | Low <sub>t-3</sub>   | Low <sub>t-20</sub> |
| High <sub>t-21</sub>     | High <sub>t-11</sub> | High <sub>t-17</sub> | High <sub>t-24</sub> | Low <sub>t-4</sub>      | Low <sub>t-12</sub>  | Low <sub>t-5</sub>   | Low <sub>t-24</sub>  |                     |
| High <sub>t-3</sub>      | High <sub>t-19</sub> | High <sub>t-12</sub> | High <sub>t-15</sub> | Low <sub>t-9</sub>      | Low <sub>t-6</sub>   | Low <sub>t-15</sub>  |                      |                     |
| High <sub>t-23</sub>     | High <sub>t-9</sub>  | High <sub>t-20</sub> | High <sub>t-13</sub> |                         |                      |                      |                      |                     |
| High <sub>t-16</sub>     |                      |                      |                      |                         |                      |                      |                      |                     |
| High <sub>4</sub>        |                      |                      |                      |                         |                      |                      |                      |                     |

**Table S5** Features selected by mRMR at Wuhan 1328A station.

| Selected features        |                       |                      |                     |                         |                      |                       |                      |
|--------------------------|-----------------------|----------------------|---------------------|-------------------------|----------------------|-----------------------|----------------------|
| High-frequency component |                       |                      |                     | Low-frequency component |                      |                       |                      |
| PM2.5 <sub>t-1</sub>     | PM2.5 <sub>t-18</sub> |                      |                     | PM2.5 <sub>t-1</sub>    | PM2.5 <sub>t-3</sub> | PM2.5 <sub>t-21</sub> | PM2.5 <sub>t-2</sub> |
| PM10 <sub>t-1</sub>      |                       |                      |                     | PM10 <sub>t-1</sub>     |                      |                       |                      |
| SO2 <sub>t-10</sub>      |                       |                      |                     | SO2 <sub>t-15</sub>     |                      |                       |                      |
| NO2 <sub>t-8</sub>       | NO2 <sub>t-1</sub>    |                      |                     | NO2 <sub>t-19</sub>     | NO2 <sub>t-2</sub>   | NO2 <sub>t-8</sub>    |                      |
| O3 <sub>t-24</sub>       | O3 <sub>t-15</sub>    |                      |                     | O3 <sub>t-24</sub>      |                      |                       |                      |
| CO <sub>t-1</sub>        | CO <sub>t-16</sub>    |                      |                     | CO <sub>t-1</sub>       |                      |                       |                      |
| High <sub>t-1</sub>      | High <sub>t-3</sub>   | High <sub>t-8</sub>  | High <sub>t-2</sub> | Low <sub>t-1</sub>      | Low <sub>t-2</sub>   | Low <sub>t-4</sub>    | Low <sub>t-18</sub>  |
| High <sub>t-22</sub>     | High <sub>t-5</sub>   | High <sub>t-12</sub> | High <sub>t-4</sub> | Low <sub>t-10</sub>     | Low <sub>t-3</sub>   | Low <sub>t-24</sub>   | Low <sub>t-6</sub>   |
| High <sub>t-6</sub>      | High <sub>t-10</sub>  | High <sub>t-24</sub> | High <sub>t-7</sub> | Low <sub>t-14</sub>     | Low <sub>t-5</sub>   | Low <sub>t-21</sub>   | Low <sub>t-8</sub>   |
| High <sub>t-17</sub>     | High <sub>t-9</sub>   |                      |                     | Low <sub>t-12</sub>     |                      |                       |                      |

**Table S6** Features selected by mRMR at Kunming 1454A station.

| Selected features        |                      |                      |                      |                         |                       |                      |                    |
|--------------------------|----------------------|----------------------|----------------------|-------------------------|-----------------------|----------------------|--------------------|
| High-frequency component |                      |                      |                      | Low-frequency component |                       |                      |                    |
| PM2.5 <sub>t-4</sub>     |                      |                      |                      | PM2.5 <sub>t-1</sub>    | PM2.5 <sub>t-23</sub> | PM2.5 <sub>t-2</sub> |                    |
| PM10 <sub>t-8</sub>      | PM10 <sub>t-1</sub>  |                      |                      | PM10 <sub>t-1</sub>     | PM10 <sub>t-2</sub>   | PM10 <sub>t-5</sub>  |                    |
| SO2 <sub>t-13</sub>      | SO2 <sub>t-24</sub>  |                      |                      | SO2 <sub>t-1</sub>      |                       |                      |                    |
| NO2 <sub>t-1</sub>       |                      |                      |                      | NO2 <sub>t-1</sub>      |                       |                      |                    |
| O3 <sub>t-21</sub>       |                      |                      |                      | O3 <sub>t-12</sub>      | O3 <sub>t-9</sub>     |                      |                    |
| CO <sub>t-7</sub>        | CO <sub>t-23</sub>   | CO <sub>t-16</sub>   | CO <sub>t-1</sub>    | CO <sub>t-3</sub>       | CO <sub>t-1</sub>     | CO <sub>t-24</sub>   | CO <sub>t-2</sub>  |
| High <sub>t-1</sub>      | High <sub>t-3</sub>  | High <sub>t-4</sub>  | High <sub>t-2</sub>  | Low <sub>t-1</sub>      | Low <sub>t-21</sub>   | Low <sub>t-4</sub>   | Low <sub>t-2</sub> |
| High <sub>t-5</sub>      | High <sub>t-6</sub>  | High <sub>t-7</sub>  | High <sub>t-8</sub>  | Low <sub>t-24</sub>     | Low <sub>t-16</sub>   | Low <sub>t-3</sub>   | Low <sub>t-9</sub> |
| High <sub>t-9</sub>      | High <sub>t-24</sub> | High <sub>t-10</sub> | High <sub>t-11</sub> | Low <sub>t-23</sub>     | Low <sub>t-19</sub>   | Low <sub>t-6</sub>   |                    |

**Table S7** Prediction performance evaluation metrics in forecasting PM2.5 concentration for next multiple hours.

| Prediction hours | Station               | Prediction performance evaluation metric |        |                |
|------------------|-----------------------|------------------------------------------|--------|----------------|
|                  |                       | RMSE                                     | MAE    | R <sup>2</sup> |
| 4                | Beijing 1005A Station | 9.5625                                   | 6.1901 | 0.9262         |
|                  | Wuhan 1328A Station   | 6.6182                                   | 4.1042 | 0.9350         |



|    |                       |         |        |        |
|----|-----------------------|---------|--------|--------|
|    | Kunming 1454A Station | 7.2362  | 5.0514 | 0.8737 |
| 8  | Beijing 1005A Station | 11.6617 | 8.1642 | 0.9044 |
|    | Wuhan 1328A Station   | 8.5453  | 5.7982 | 0.8991 |
|    | Kunming 1454A Station | 9.6942  | 7.3415 | 0.8310 |
|    |                       |         |        |        |
| 12 | Beijing 1005A Station | 13.4983 | 9.6436 | 0.8941 |
|    | Wuhan 1328A Station   | 10.4294 | 7.8071 | 0.8829 |
|    | Kunming 1454A Station | 11.1412 | 8.9208 | 0.8106 |
|    |                       |         |        |        |

**Table S8** prediction performance evaluation metrics of the comparative models at the Beijing 1005A Station in forecasting PM2.5 concentration for next multiple hours.

| Prediction hours | Model         | Prediction performance evaluation metric |         |                |
|------------------|---------------|------------------------------------------|---------|----------------|
|                  |               | RMSE                                     | MAE     | R <sup>2</sup> |
| 4                | LSTM          | 11.3307                                  | 7.4324  | 0.9117         |
|                  | GRU           | 11.1802                                  | 7.4585  | 0.9108         |
|                  | GWNN          | 10.5917                                  | 7.12037 | 0.9194         |
|                  | mRMR-GWNN     | 10.1433                                  | 6.4424  | 0.9246         |
|                  | EMD-mRMR-GWNN | 9.5625                                   | 6.1901  | 0.9262         |
|                  |               |                                          |         |                |
| 8                | LSTM          | 13.2038                                  | 9.3952  | 0.8926         |
|                  | GRU           | 13.4089                                  | 9.4121  | 0.8899         |
|                  | GWNN          | 12.8583                                  | 9.1683  | 0.8947         |
|                  | mRMR-GWNN     | 12.7021                                  | 8.5800  | 0.8969         |
|                  | EMD-mRMR-GWNN | 11.6617                                  | 8.1642  | 0.9044         |
|                  |               |                                          |         |                |
| 12               | LSTM          | 15.9237                                  | 10.9516 | 0.8711         |
|                  | GRU           | 16.2873                                  | 11.0350 | 0.8668         |
|                  | GWNN          | 15.1590                                  | 10.6168 | 0.8732         |
|                  | mRMR-GWNN     | 14.3328                                  | 10.1320 | 0.8844         |
|                  | EMD-mRMR-GWNN | 13.4983                                  | 9.6436  | 0.8941         |
|                  |               |                                          |         |                |

**Table S9** prediction performance evaluation metrics of the comparative models at the Wuhan 1328A Station in forecasting PM2.5 concentration for next multiple hours.

| Prediction hours | Model         | Prediction performance evaluation metric |        |                |
|------------------|---------------|------------------------------------------|--------|----------------|
|                  |               | RMSE                                     | MAE    | R <sup>2</sup> |
| 4                | LSTM          | 7.8529                                   | 5.2437 | 0.9081         |
|                  | GRU           | 7.9757                                   | 5.3104 | 0.9061         |
|                  | GWNN          | 7.5774                                   | 4.7391 | 0.9208         |
|                  | mRMR-GWNN     | 7.1175                                   | 4.3898 | 0.9267         |
|                  | EMD-mRMR-GWNN | 6.6182                                   | 4.1042 | 0.9350         |
|                  |               |                                          |        |                |
| 8                | LSTM          | 9.8435                                   | 6.9186 | 0.8844         |
|                  | GRU           | 9.9877                                   | 7.1226 | 0.8808         |
|                  | GWNN          | 9.5903                                   | 6.6195 | 0.8876         |
|                  | mRMR-GWNN     | 9.0077                                   | 6.0367 | 0.8918         |
|                  | EMD-mRMR-GWNN | 8.5453                                   | 5.7982 | 0.8991         |
|                  |               |                                          |        |                |
| 12               | LSTM          | 12.0502                                  | 9.4467 | 0.8646         |
|                  | GRU           | 12.1305                                  | 9.2576 | 0.8659         |

|               |          |        |        |
|---------------|----------|--------|--------|
| GWNN          | 11.5736  | 8.7433 | 0.8704 |
| mRMR-GWNN     | 10.83892 | 8.1691 | 0.8789 |
| EMD-mRMR-GWNN | 10.4294  | 7.8071 | 0.8829 |

**Table S10** prediction performance evaluation metrics of the comparative models at the Kunming 1454A Station in forecasting PM2.5 concentration for next multiple hours.

| Prediction hours | Model         | Prediction performance evaluation metric |         |                |
|------------------|---------------|------------------------------------------|---------|----------------|
|                  |               | RMSE                                     | MAE     | R <sup>2</sup> |
| 4                | LSTM          | 9.0164                                   | 6.2296  | 0.8312         |
|                  | GRU           | 8.8119                                   | 6.0551  | 0.8334         |
|                  | GWNN          | 8.7029                                   | 5.8663  | 0.8395         |
|                  | mRMR-GWNN     | 8.3945                                   | 5.5060  | 0.8435         |
|                  | EMD-mRMR-GWNN | 7.2362                                   | 5.0514  | 0.8737         |
| 8                | LSTM          | 11.1223                                  | 8.3705  | 0.8137         |
|                  | GRU           | 10.9491                                  | 8.4109  | 0.8107         |
|                  | GWNN          | 10.8900                                  | 8.1956  | 0.8190         |
|                  | mRMR-GWNN     | 10.2392                                  | 7.9683  | 0.8251         |
|                  | EMD-mRMR-GWNN | 9.6942                                   | 7.3415  | 0.8310         |
| 12               | LSTM          | 13.9136                                  | 10.2953 | 0.7924         |
|                  | GRU           | 13.8432                                  | 10.2029 | 0.7918         |
|                  | GWNN          | 13.4732                                  | 10.0328 | 0.7960         |
|                  | mRMR-GWNN     | 12.7180                                  | 9.6119  | 0.8015         |
|                  | EMD-mRMR-GWNN | 11.1412                                  | 8.9208  | 0.8106         |
